# Supplementary material for: A new methodological framework for geophysical sensor combinations associated with machine learning algorithms to understand soil attributes
Source: Copernicus journal article supplement (doi:10.5194/gmd-15-1219-2022), 2022-02-10
Supplement: Supplementary file 1 [file gmd-15-1219-2022-supplement.pdf]

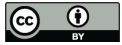

*Supplement of*

**A new methodological framework for geophysical sensor combinations associated with machine learning algorithms to understand soil attributes**

**Danilo César de Mello et al.**

*Correspondence to:* José Alexandre Melo Demattê ([jamdemat@usp.br](mailto:jamdemat@usp.br))

The copyright of individual parts of the supplement might differ from the article licence.

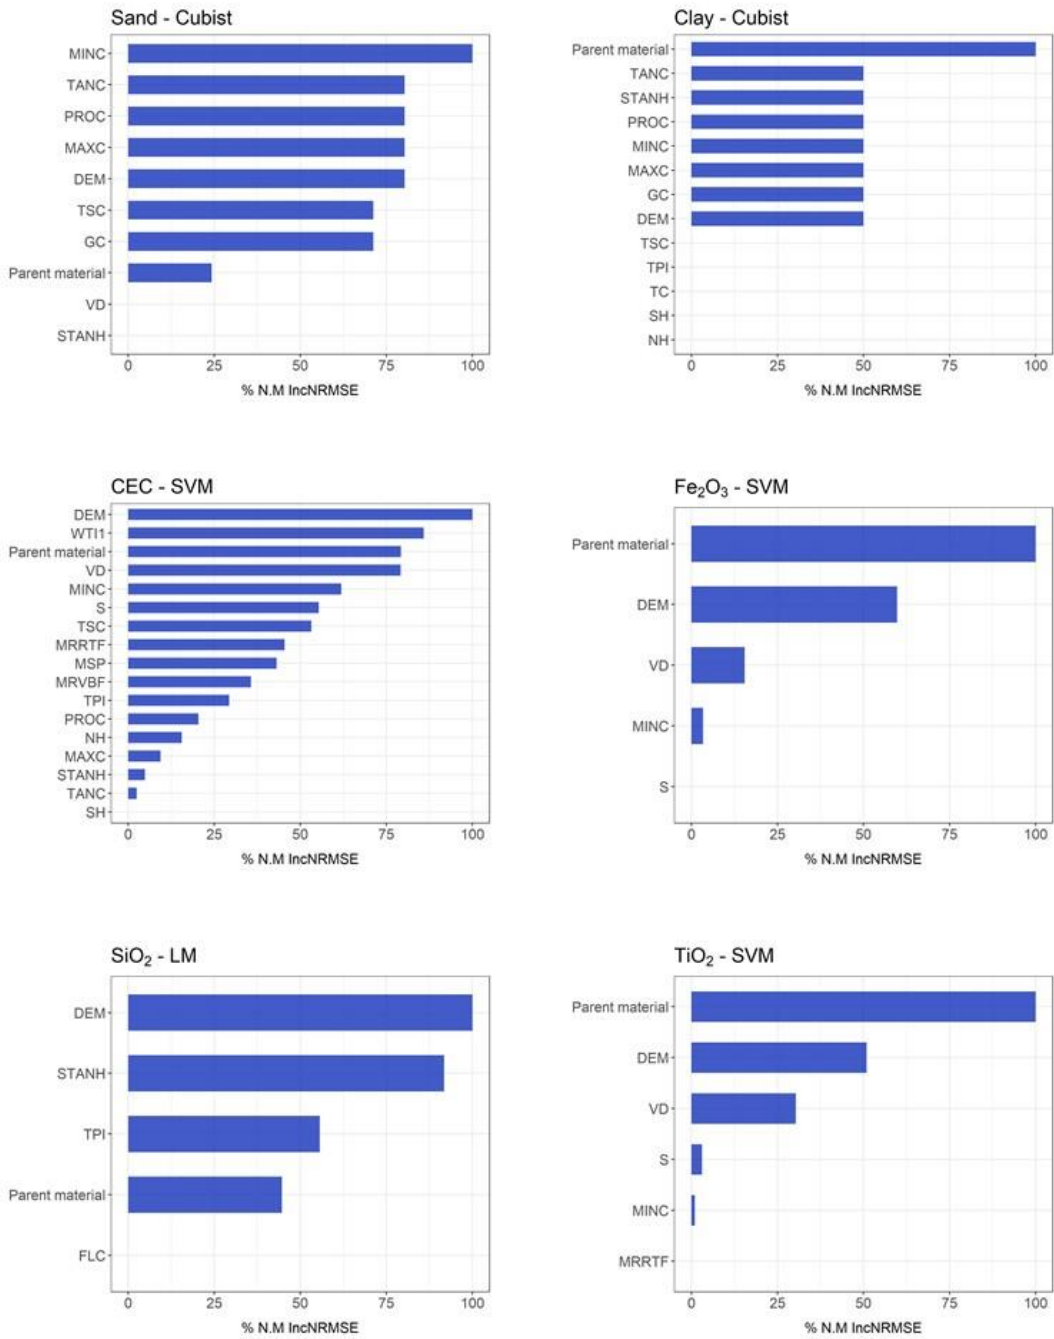

**Fig. S1** Variable Importance for *Non-use of geophysical sensors*

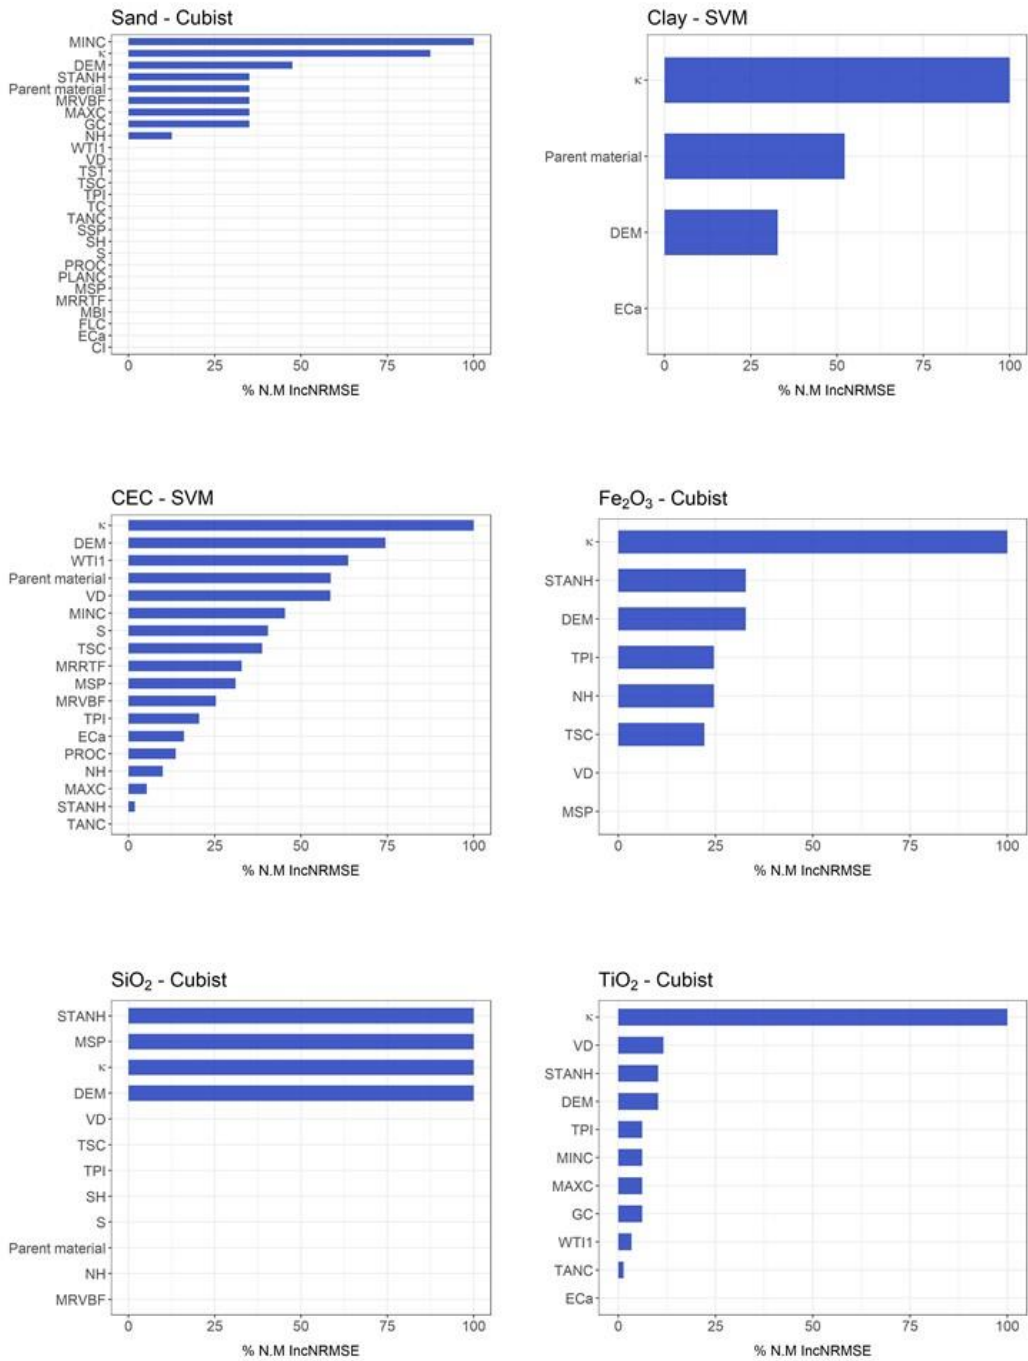

**Fig. S2** Variable Importance for *Susceptibilimeter + Conductivimeter* sensors

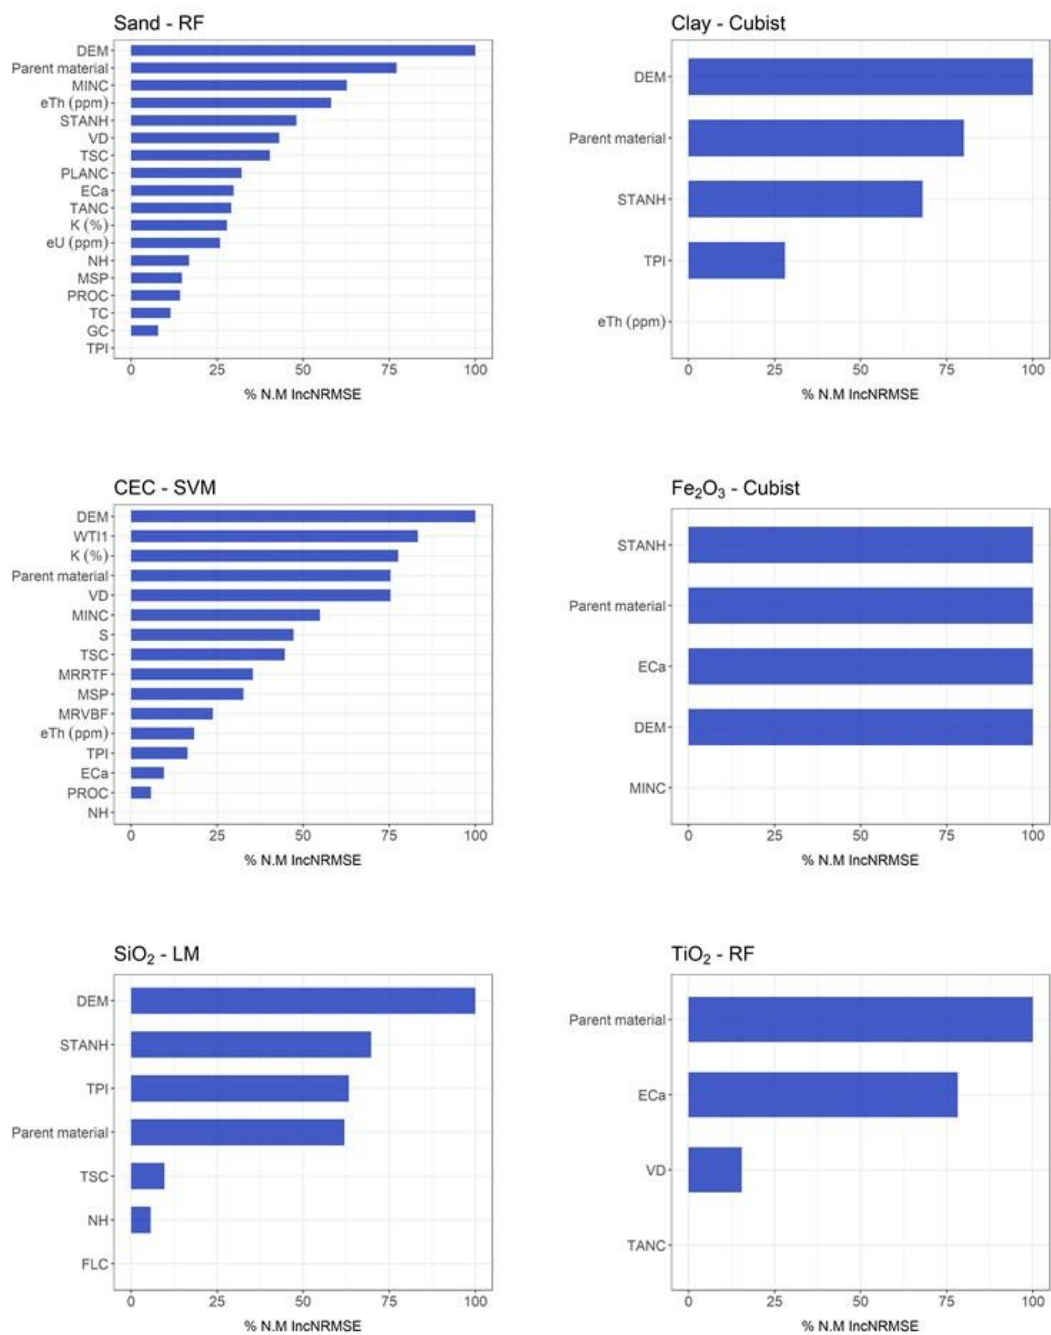

**Fig. S3** Variable Importance for *Gamma-ray spectrometer + Conductivimeter sensors*

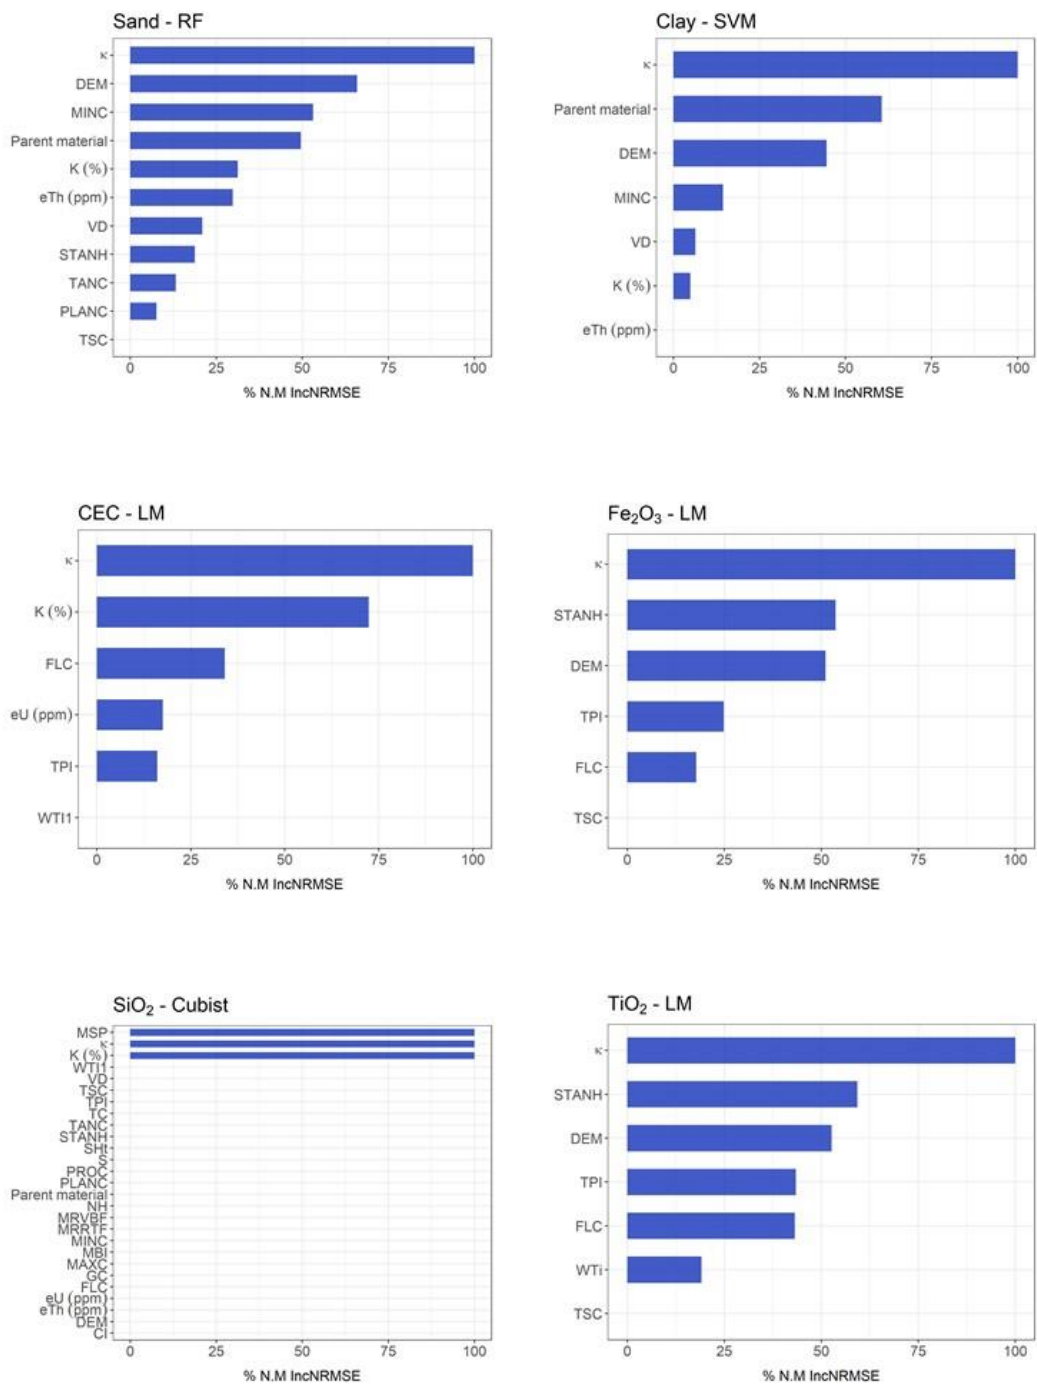

**Fig. S4** Variable Importance for *Gamma-ray spectrometer + Susceptibilimeter sensors*

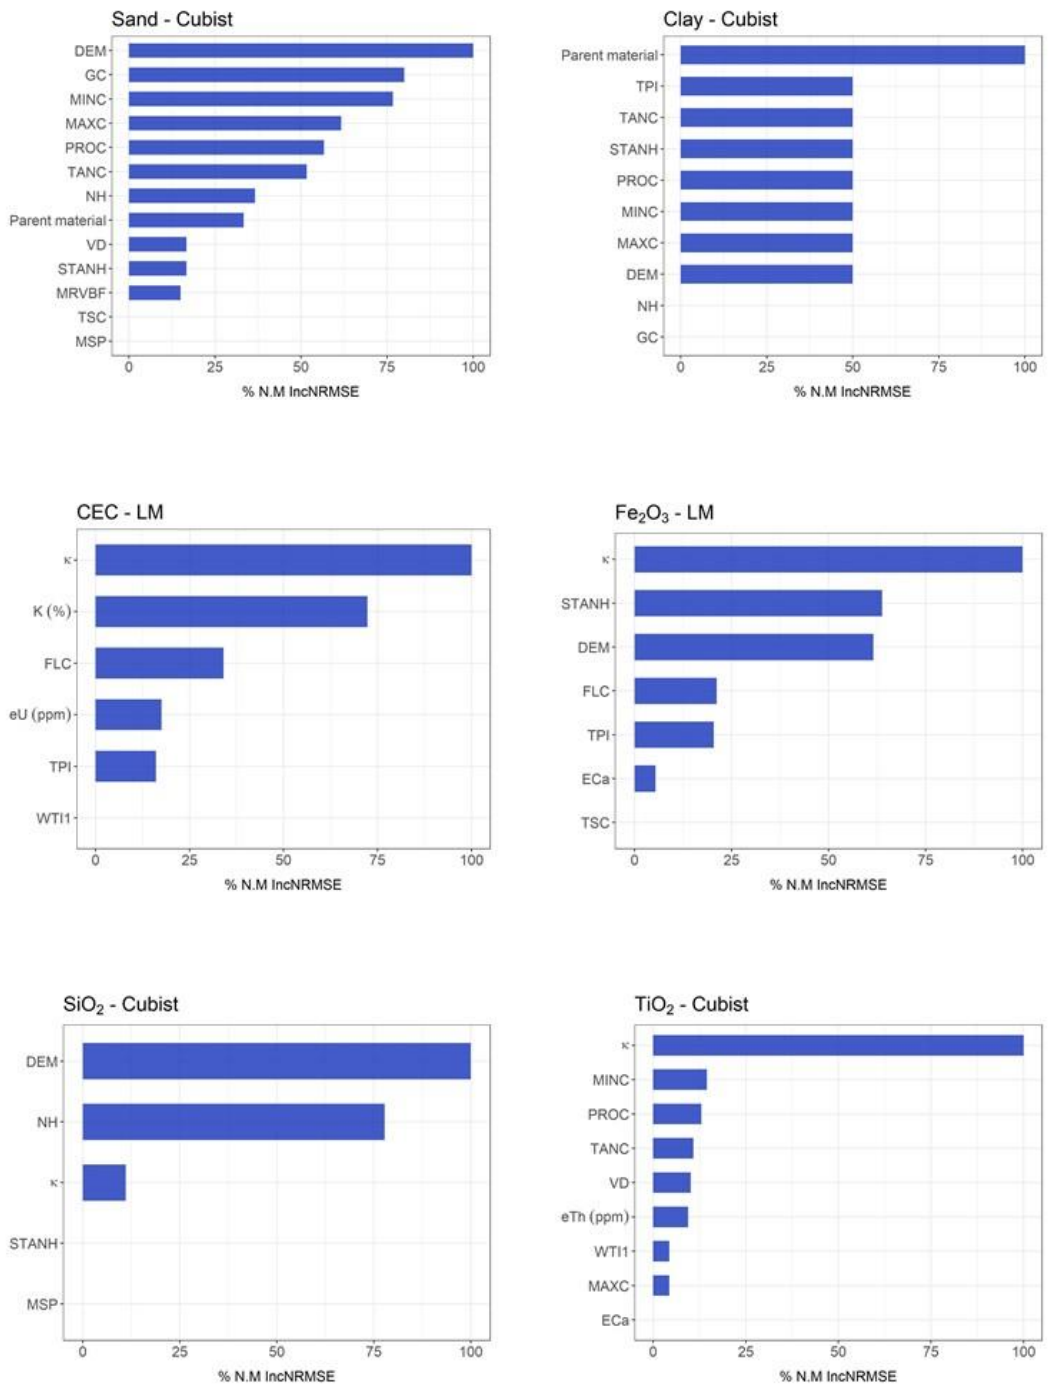

**Fig. S5** Variable Importance for *Combined use of the three geophysical sensors*
